## Posters

### Clinical Quality: Clinical Effectiveness

#### 48 DO EXERCISE PROGRAMMES FOR OLDER PEOPLE WITH SARCOPENIA OR FRAILTY DELIVER AN EVIDENCE-BASED SERVICE? FINDINGS FROM A UK SURVEY

M. Chawner<sup>1</sup>, S. De Biase<sup>2</sup>, N. J. Offord<sup>3</sup>, O. Todd<sup>4</sup>, A. Clegg<sup>4</sup>, A. A. Sayer<sup>5</sup>, M. D. Witham<sup>5</sup>

<sup>1</sup> Solent NHS Trust

<sup>2</sup> AGILE Network, Chartered Society of Physiotherapy

<sup>3</sup> Sheffield Teaching Hospitals NHS Foundation Trust

<sup>4</sup> Academic Unit of Elderly Care and Rehabilitation, University of Leeds

<sup>5</sup> AGE Research Group, NIHR Newcastle Biomedical Research Centre

**Background:** Awareness of sarcopenia and frailty is growing and both are known to be potentially reversible with effective resistance training. We aimed to establish whether existing exercise programmes offered to people with sarcopenia or frailty adhere to the known evidence base.

**Methods:** We conducted a national on-line survey of practitioners delivering exercise programmes to older people with sarcopenia or frailty. The link to the online survey was distributed through the British Geriatrics Society, Chartered Society of Physiotherapy Special Interest Group for Older People (AGILE), the NHS England Future Collaboration Platform “Supporting People Living with Frailty” forum and social media. Questions covered target population and aims of the exercise programme, type, duration and frequency of exercise, progress assessment and outcome measures. Descriptive analyses were conducted using SPSS v24.

**Results:** 136 responses were received from respondents who worked for NHS Trusts, clinical commissioning groups, private practices, and third sector providers. 94% of respondents reported prescribing or delivering exercise programmes to people with sarcopenia or frailty. Most programmes (81/135 [60%]) were primarily designed to prevent or reduce falls. Resistance training was reported as the main focus of the programme in only 11/123 (9%); balance training was the main focus in 61/123 (50%) and functional exercise in 28/123 (23%). Exercise was offered once a week or less by 81/124 (65%) of respondents; the median number of sessions offered was 8.5 (IQR 6 to 12). Outcome measures suitable for assessing the effect of resistance training programmes were reported by fewer than half of respondents (hand grip: 13/119 [11%]; chair stands: 55/119 [46%], short physical performance battery: 4/119 [3%]).

**Conclusions:** Current exercise programmes offered to older people with sarcopenia or frailty lack the frequency, duration or specificity of exercise likely to improve outcomes for this group of patients.
